# Supplementary material for: Pipefish Locally Adapted to Low Salinity in the Baltic Sea Retain Phenotypic Plasticity to Cope With Ancestral Salinity Levels
Source: Frontiers journal article supplement (doi:10.3389/fevo.2021.626442), 2021-03-25
Supplement: Presentation_1.pdf [file Presentation_1.pdf]

## *Supplement Material*

### Supplement 1: PCR Protocol for MultiplexMix Reaction

| Pool   | Marker              | Color       | Length    | Primer<br>per sample |
|--------|---------------------|-------------|-----------|----------------------|
| Pool A | Sy_ty_1_Hex_202_fo  | Hex (green) | 175 – 250 | 0.5 µl               |
|        | Sy_ty_1_Hex_202_re  |             |           | 0.5 µl               |
|        | Sy_ty_4_Hex_123_fo  | Hex (green) | 100 – 150 | 0.125µl              |
|        | Sy_ty_4_Hex_123_re  |             |           | 0.125µl              |
|        | Sy_ty_6_Fam_157_fo  | Fam (blue)  | 150 – 200 | 0.125µl              |
|        | Sy_ty_6_Fam_157_re  |             |           | 0.125µl              |
|        | Sy_ty_7_Fam_101_fo  | Fam (blue)  | ~ 100     | 0.125µl              |
|        | Sy_ty_7_Fam_101_re  |             |           | 0.125µl              |
| Pool B | Sy_ty_11_Hex_117_fo | Fam (blue)  | 100 – 125 | 0.125µl              |
|        | Sy_ty_11_Hex_117_re |             |           | 0.125µl              |
|        | Sy_ty_22_Hex_150_fo | Hex (green) | ~ 150     | 0.125µl              |
|        | Sy_ty_22_Hex_150_re |             |           | 0.125µl              |
|        | Sy_ty_23_Fam_152_fo | Fam (blue)  | 125 - 150 | 0.125µl              |
|        | Sy_ty_23_Fam_152_re |             |           | 0.125µl              |
| Pool C | Sy_ty_16_Hex_175_fo | Hex (green) | 150 – 200 | 0.125µl              |
|        | Sy_ty_16_Hex_175_re |             |           | 0.125µl              |
|        | Sy_ty_17_Fam_229_fo | Fam (blue)  | 200 – 250 | 0.25µl               |
|        | Sy_ty_17_Fam_229_re |             |           | 0.25µl               |
|        | Sy_ty_21_Hex_224_fo | Hex (green) | 200 – 250 | 0.25µl               |
|        | Sy_ty_21_Hex_224_re |             |           | 0.25µl               |
|        | Sy_ty_24_Hex_115_fo | Hex (green) | 100 - 150 | 0.125µl              |
|        | Sy_ty_24_Hex_115_re |             |           | 0.125µl              |

### PCR Protocol for MultiplexMix Reaction:

initial primer concentration: 5pmol

#### Pool A

10 µl reaction volume :

- 5 µl Multiplex Mastermix
- 1.75 µl Primermix Pool A
- 2.25 µl HPLC Water
- 1 µl DNA Sample

### **Pool B**

10 µl reaction volume :

- 5 µl Multiplex Mastermix
- 0.75 µl Primermix Pool B
- 3.25 µl HPLC Water
- 1 µl DNA Sample

### **Pool C**

10 µl reaction volume :

- 5 µl Multiplex Mastermix
- 1.5 µl Primermix Pool C
- 2.5 µl HPLC Water
- 1 µl DNA Sample

### **The Multiplex PCR protocol (26 cycles)**

- Initial activation 95° 15 min
- Denaturing 94° 0:30 min
- Annealing 58° 1:30 min
- Extension 72° 1 min
- Final Extension 60° 30 min
- 4° ∞

Extracted DNA from fin clips of every female *Syngnathus typhle* was sampled for 11 microsatellite loci. Microsatellite loci were pooled in 3 reactions containing 3 or 4 primer pairs. Taq polymerase and the Qiagen Multiplex PCR mix was used to amplify several loci at once in the same reaction. Reactions took place with a final volume of 10 µL with 1 µL DNA extract (template) in 96-well plates.

**Supplement Table S 2:** Name and function of target genes used to study gene expression. Listed are all target genes from four different functional categories: general metabolism, immune response (adaptive and innate), gene regulation (acetylation and methylation) and osmoregulation. The column ‘Organism’ specifies, whether the gene was targeted in female (f) or juvenile (juv) samples.

| Gene      | Organism | Category                  | Gene name                                      | Function                                                            | Reference              |
|-----------|----------|---------------------------|------------------------------------------------|---------------------------------------------------------------------|------------------------|
| BROMO     | juv, f   | epigenetic/<br>activation | Histone acetyltransferase                      | Histone acetylation                                                 | Beemelmans & Roth 2016 |
| MYST      | juv      | epigenetic                | Histone acetyltransferase                      | Histone acetylation                                                 | Beemelmans & Roth 2016 |
| Bcell.rap | juv      | adaptive                  | B-cell receptor-associated protein             | T- and B-cell regulation activity                                   | Roth et al. 2012       |
| CD45      | juv      | adaptive                  | CD45 (Leukocyte common antigen)                | T-cell and B-cell antigen receptor signalling                       | Beemelmans & Roth 2016 |
| HIVEP2    | juv      | adaptive                  | Human immunodeficiency virus type 1 enhancer 2 | Transcription factor, V(D)J recombination, MHC enhancer binding     | Beemelmans & Roth 2016 |
| HIVEP3    | juv      | adaptive                  | Human immunodeficiency virus type 1 enhancer 3 | Transcription factor, V(D)J recombination, MHC enhancer binding     | Beemelmans & Roth 2016 |
| IgM       | juv      | adaptive                  | Immunoglobulin light chain                     | Antigen/pathogen recognition                                        | Beemelmans & Roth 2016 |
| lymphag75 | juv      | adaptive                  | Lymphocyte antigen 75                          | Antigen recognition                                                 | Birrer et al. 2012     |
| aif       | juv, f   | innate                    | Allograft inflammation factor                  | Inflammatory responses, allograft rejection, macrophages activation | Roth et al. 2012       |
| apoa1     | juv      | innate                    | Apolipoprotein A1                              | Antimicrobial activity                                              | Roth et al in prep.    |
| c1        | juv      | innate                    | Recognition subcomponent C1q                   | Antigen-antibody complex formation                                  | Beemelmans & Roth 2016 |
| c3        | juv      | innate                    | Complement component 3                         | Complement system activation                                        | Birrer et al. 2012     |
| c9        | juv      | innate                    | Complement component 9                         | Membrane attack complex, bacteria lysis                             | Roth et al. 2012       |
| cf        | juv, f   | innate                    | Coagulation factor II                          | Blood clotting and inflammation response                            | Birrer et al. 2012     |
| hsp60     | juv, f   | innate                    | Heat shock protein 60 kDa                      | Chaperone, general stress response                                  | Roth et al. 2012       |
| il10      | juv      | innate                    | Interleukin 10                                 | Macrophage activity regulation                                      | Birrer et al. 2012     |
| il8       | juv      | innate                    | Interleukin 8                                  | Phagocytosis, inflammation                                          | Beemelmans & Roth 2016 |

| Gene     | Organism | Category                  | Gene name                                           | Function                                                           | Reference                   |
|----------|----------|---------------------------|-----------------------------------------------------|--------------------------------------------------------------------|-----------------------------|
| kin      | juv, f   | innate                    | Kinesin                                             | Intracellular transport                                            | Roth et al. 2012            |
| lectpt2  | juv, f   | innate                    | Lectin protein type II                              | Pathogen recognition receptor                                      | Beemelmanns & Roth 2016     |
| tranfe   | juv, f   | innate                    | Transferrin                                         | Bacterial growth prevention                                        | Beemelmanns & Roth 2016     |
| tspo     | juv, f   | innate                    | Translocator protein                                | Inflammatory responses, allograft rejection, macrophage activation | Roth et al. 2012            |
| tyroprot | juv, f   | innate & adaptive         | Tyrosine kinase                                     | Cytokine receptor signalling                                       | Beemelmanns & Roth 2016     |
| ddpgly   | juv, f   | metabolism                | Ddp-glycosyltransferase                             | Metabolizing process (natural glycosidic linkages)                 | Roth et al. in prep.        |
| g6DPH    | juv, f   | metabolism                | Glucose 6 phosphate dehydrogenase (G6PD)            | Metabolizing process (pentose phosphate pathway)                   | Roth et al. in prep.        |
| ptgis    | juv      | metabolism                | Prostaglandin I2 Synthase                           | Lipid and fatty acid metabolism                                    | Roth et al. in prep.        |
| ripop    | juv, f   | metabolism                | Ribosomal protein                                   | Translation process                                                | Roth et al. in prep.        |
| TNF      | juv      | metabolism                | Tumor necrosis factor                               | Lipid metabolism                                                   | Roth et al. in prep.        |
| ubi      | juv, f   | metabolism                | Ubiquitin                                           | Regulatory protein labelling for degradation                       | Birrer, Reusch, et al. 2012 |
| DnMt3B   | juv      | epigenetic                | DNA methyltransferase 3b                            | De novo methylation                                                | Beemelmanns & Roth 2016     |
| JmicPhD  | juv, f   | epigenetic/<br>silencing  | Lysine-specific demethylase 5B                      | Histone demethylation                                              | Beemelmanns & Roth 2016     |
| N6admet  | juv      | epigenetic/<br>activation | N(6)- adenine-specific DNA-methyltransferase 2      | DNA-methyltransferase                                              | Beemelmanns & Roth 2016     |
| no66     | juv, f   | epigenetic/<br>silencing  | Lysine-specific histone demethylase NO66            | Histone demethylation                                              | Beemelmanns & Roth 2016     |
| TPR      | juv, f   | epigenetic/<br>activation | Lysine-specific demethylase 6A                      | Histone demethylation                                              | Beemelmanns & Roth 2016     |
| aqp3     | juv      | osmoregulation            | Aquaporin 3                                         | Water and small solute channel                                     | This study                  |
| atp1a1   | juv      | osmoregulation            | ATPase alpha 1                                      | Na <sup>+</sup> /K <sup>+</sup> transporting                       | This study                  |
| cfr      | juv      | osmoregulation            | Cystic fibrosis transmembrane conductance regulator | Apical membrane anion channel                                      | This study                  |
| cldn1    | juv      | osmoregulation            | Claudin 1                                           | Epithelial permeability regulation                                 | This study                  |
| hsp70    | juv      | osmoregulation            | Heat shock protein 70 kDa                           | Osmotic stress response                                            | This study                  |

| Gene       | Organism | Category                            | Gene name                                                    | Function                                                                              | Reference               |
|------------|----------|-------------------------------------|--------------------------------------------------------------|---------------------------------------------------------------------------------------|-------------------------|
| kcnh8      | juv      | osmoregulation                      | Voltage gated potassium channel subfamily h member 8         | Cell volume regulation                                                                | This study              |
| mapk8ip3   | juv      | osmoregulation                      | Mitogen-activated protein kinase 8 interacting protein 3     | Osmosensing                                                                           | This study              |
| nkcc2      | juv      | osmoregulation                      | Na <sup>+</sup> /K <sup>+</sup> /2Cl cotransporter (Slc12A1) | Ion transport                                                                         | This study              |
| nr3c1      | juv      | osmoregulation                      | Nuclear Receptor Subfamily 3 Group C Member 1                | Glucocorticoid receptor                                                               | This study              |
| prl        | juv      | osmoregulation                      | Prolactin                                                    | Ion uptake promotion; ion secretion inhibition                                        | This study              |
| prlr       | juv, f   | osmoregulation                      | Prolactin receptor                                           | Prolactin receptor                                                                    | This study              |
| hdac1      | juv      | reference/<br>epigenetic            | Histone deacetylase 1-like                                   | Histone deacetylation                                                                 | Beemelmans & Roth 2016  |
| hdac3      | juv      | reference/<br>epigenetic            | Histone deacetylase 3-like                                   | Histone deacetylation                                                                 | Beemelmans & Roth 2016  |
| ash        | juv      | reference/epigene<br>tic/activation | Histone methyltransferase                                    | Histone methyltransferase                                                             | Beemelmans & Roth 2016  |
| calrcul    | f        | innate                              | Calreticulin                                                 | Chaperone, promotes phagocytosis and clearance of apoptotic cells                     | Beemelmans & Roth 2016  |
| ck7        | f        | innate & adaptive                   | Chemokine 7                                                  | Chemotaxis for leukocytes, monocytes, neutrophils, blood cells                        | Beemelmans & Roth 2016  |
| dnmt1      | f        | epigenetic/<br>silencing            | DNA (cytosine-5)-methyltransferase 1                         | copies complementary marks of newly replicated DNA, maintenance methylation           | Beemelmans & Roth 2016  |
| dnmt3a     | f        | epigenetic/<br>silencing            | DNA (Cytosine-5-)-Methyltransferase 3 Alpha                  | de novo modifications; essential for epigenetic changes based on environmental stress | Beemelmans & Roth 2016, |
| hdac6      | f        | epigenetic/<br>silencing            | Histone deacetylase 6-like                                   | Histone deacetylation (deacetylation lysine residues of core histones)                | Beemelmans & Roth 2016  |
| hemk2      | f        | epigenetic/<br>silencing            | HemK-methyltransferase family member 2                       | DNA methyltransferase (N6-methyladenine)                                              | Beemelmans & Roth 2016, |
| ik-cytoine | f        | adaptive &<br>innate                | Ik cytokine(RED-protein)                                     | Inhibits interferon gamma mediated downregulation of MHCII                            | Beemelmans & Roth 2016  |
| Inf        | f        | innate                              | Interferon induced_trans_membrane protein 3                  | Negative regulation of viral entry into host cell, antiviral response                 | Beemelmans & Roth 2016  |

### Supplement 3: Description and selection of osmoregulatory genes

Osmoregulatory target genes were selected based on their function, involvement in adaptation to marine or freshwater environment, and/or inducibility upon salinity stress. The genes aquaporin 3 (*AQP3*), claudin 1 (*CLDN1*) and mitogen-activated protein kinase 8 interacting protein 3 (*MAPK8IP3*) were recently shown to alter their expression in response to different salinity treatments in alewives *Alosa pseudoharengus* (Velotta, Wegrzyn et al. 2017). *AQP3* is a member of transmembrane channel proteins transporting water and small solutes. It plays a major role in osmoregulatory organs such as the gill, kidney, oesophagus and intestine (Cutler, Martinez et al. 2007). *CLDN1* is a cell surface component of tight junction complexes (Paris, Tonutti et al. 2008) and *MAPK8IP3* is involved in osmosensing (Velotta, Wegrzyn et al. 2017). ATPase Na<sup>+</sup>/K<sup>+</sup> transporting subunit alpha 1 (*ATP1α1*), cystic fibrosis transmembrane regulator (*CFTR*), Na<sup>+</sup>/K<sup>+</sup>/2Cl<sup>-</sup> cotransporter (*NKCC*) and heat shock protein 70 kDa (*HSP70*) were all found to be induced upon salinity changes (Hwang and Lee 2007, Taugbol, Arntsen et al. 2014, Ronkin, Seroussi et al. 2015). *ATP1α1*, a membrane spanning enzyme active for example in fish gills, actively transports sodium ions (Na<sup>+</sup>) out of and potassium ions (K<sup>+</sup>) into a cell (Cutler, Martinez et al. 2007, Hwang and Lee 2007). *CFTR* is an apical membrane anion channel secreting Cl<sup>-</sup>, and *NKCC2* (*NKCC* isoform 2; also known as solute carrier family 12 member 1) is an ion cotransporter located in the membrane (Hwang and Lee 2007). Other important ion transporters like voltage gated potassium channel genes regulate cell volume and the subfamily h member 4 (*KCNH4*) gene was shown to be involved in freshwater adaptation in the three-spined stickleback *Gasterosteus aculeatus* (Taugbol, Arntsen et al. 2014). However, as no orthologous for *KCNH4* could be identified in the *S. typhle* genome, the closely related *KCNH8* was selected for this study instead (Gutman, Chandy et al. 2005). Additionally, *ATP1α1*, *CFTR*, *KCNH4* were proposed to be under selection in animals exposed to marine-freshwater gradients (Tomy, Chang et al. 2009, Taugbol, Arntsen et al. 2014) showed that expression of the prolactin receptor gene (*PRLR*) was correlated with adaptation to freshwater. Among other functions, the hormone prolactin (*PRL*) regulates water and electrolyte balance by promoting ion intake and inhibiting ion secretion (McCormick 2001, Manzon 2002). Gene nuclear receptor subfamily 3 group C member 1 (*NR3C1*) encodes glucocorticoid receptor, which stimulates ATPase Na<sup>+</sup>/K<sup>+</sup> transport and proliferation and differentiation of ion transporting chloride-cells in osmoregulatory organs (Marshall, Cozzi et al. 2005). *NR3C1* expression has also been linked to salinity stress in the euryhaline fish black porgy *Acanthopagrus schlegeli* (Tomy, Chang et al. 2009) (Table S2).

#### **Supplement 4: Design of primers for osmoregulatory genes**

Transcripts for (iv) osmoregulatory genes in *S. typhle* were identified by searching for orthologous of candidate genes in transcriptomes from other teleost fish. The transcripts were taken from the NCBI nucleotide database (<https://www.ncbi.nlm.nih.gov/nucleotide>) and using the basic local alignment search tool BLAST (Altschul, Gish et al. 1990). The osmoregulatory candidate genes were identified in the *S. typhle* transcriptome and genome (Haase, Roth et al. 2013, Roth, Solbakken et al. 2020). Additionally, the protein product of the *S. typhle* gene transcript was verified in UniProt (The UniProt Consortium 2017). *S. typhle* specific primer pairs for 11 osmoregulatory genes were designed with Primer3web (version 4.1.0; for parameters see Table S1) and, finally, primer specificity was checked with BLAST against the *S. typhle* genome and transcriptome. Whenever possible, primers were designed to span Exon-Exon boundaries, visualized in alignment viewer and editor AliView (Larsson 2014).

The efficiency of potential primers was tested with quantitative real time polymerase chain reactions (qPCR) in a dilution series (1:10, 1:20, 1:40, 1:80, 1:160, 1:320). Primer specificity was checked again by visual evaluation of the melting curves. Only candidate primer pairs with efficiency between 79 - 106 % and standard curve slope (log quantity vs. threshold cycles) between -3.2 and -4.2 were chosen for the study (Table S3).

**Table S4: Osmoregulatory gene primers.** Primer sequences and properties of all primers osmoregulatory gene primers used in this study. Hits on scaffold, hit annotation and PCR product sequence can be found in the data archive PANGAEA.

| Gene     | Target                                                                    | Primer Sequence (forward/reverse) | PCR product length | melting temperature | efficiency [%] |
|----------|---------------------------------------------------------------------------|-----------------------------------|--------------------|---------------------|----------------|
| aqp3     | Aquaporin 3                                                               | CTTCCAGATCCGCAACCTACTG            | 145                | 60.74               | 105.8          |
|          |                                                                           | GGCAAAGTTAACCGTCAAGAACA           |                    | 59.93               |                |
| atp1a1   | ATPase alpha 1                                                            | GCTGGGAAGAGGGAAAGATGAT            | 170                | 59.83               | 85.5           |
|          |                                                                           | GGTCGGTTCCGTACTTCCTATG            |                    | 60.22               |                |
| zcldn1   | Claudin 1                                                                 | AACGACAACACCAAAGCTTACG            | 145                | 59.97               | 89.4           |
|          |                                                                           | ATGATCTCCACCATGACGTACG            |                    | 59.97               |                |
| mapk8ip3 | Mitogen-activated protein kinase 8 interacting protein 3                  | CACGAAATCAAAGACGCCAAGT            | 130                | 60.03               | 89             |
|          |                                                                           | GAAGCTGTTTGTCTCCGTCAG             |                    | 59.78               |                |
| prl      | Prolactin                                                                 | TGGTTTTGTCTCTTCCGCTAA             | 182                | 59.89               | 88.6           |
|          |                                                                           | GATGTCATTGCCGCCTCTGTA             |                    | 60.47               |                |
| prlr     | Prolactin receptor                                                        | CGGCTGGATCACACTCATCTAT            | 188                | 59.7                | 83.9           |
|          |                                                                           | TTTGGGACTCAGAGCTCCATTC            |                    | 60.03               |                |
| nr3c1    | Nuclear Receptor Subfamily 3 Group C Member 1                             | TCCCGTCAACAGGAAGTCTTTT            | 163                | 59.83               | 73.3           |
|          |                                                                           | ACGTTGGCAGTGATAGAAGAGG            |                    | 60.09               |                |
| cftr     | Cystic fibrosis transmembrane conductance regulator                       | AAGTTGGACCTCACTGACGTTT            | 125                | 60.09               | 86.4           |
|          |                                                                           | CGCATCAAACCTGGGCTTCTTC            |                    | 60.14               |                |
| kcnh8    | Voltage gated potassium channel subfamily h member 8                      | CTCATCTTTGCACTCGTCAACC            | 181                | 59.84               | 79.2           |
|          |                                                                           | GCTGGCAGTTAAACAACGACAT            |                    | 60.03               |                |
| hsp70    | Heat shock protein 70 kDa                                                 | TGAGGGCGTTGATTTCTACACA            | 124                | 59.96               | 81.6           |
|          |                                                                           | GCCCTTGTCATCTTAGCATCT             |                    | 60.16               |                |
| nkcc2    | Na <sup>+</sup> /K <sup>+</sup> /2Cl <sup>-</sup> cotransporter (Slc12A1) | CTTCATCCTACTGGCGGCTATT            | 145                | 59.96               | 98             |
|          |                                                                           | CGACTCTTGATTCTGAAAGCC             |                    | 59.32               |                |



**Table S5: Sample size of target gene expression for females**, including sampling site, salinity category at origin, salinity acclimation in the lab and number of processed females

| Origin       | Origin salinity | Acclimation salinity | Number of females |
|--------------|-----------------|----------------------|-------------------|
| Flensburg    | High            | High                 | 14                |
|              | High            | Low                  | 15                |
| Falkenstein  | High            | High                 | 14                |
|              | High            | Low                  | 14                |
| Fehmarn      | High            | High                 | 12                |
|              | High            | Low                  | 13                |
| Salzhaff     | Low             | High                 | 12                |
|              | Low             | Low                  | 15                |
| Ruegen North | Low             | High                 | 11                |
|              | Low             | Low                  | 12                |
| Ruegen South | Low             | High                 | 12                |
|              | Low             | Low                  | 11                |

**Table S6: Pairwise  $F_{st}$  of pipefish from different sampling sites**

| Comparison  | FST    |
|-------------|--------|
| Falck-Fehm  | 0.0239 |
| Falck-Flens | 0.0162 |
| Falck-Salz  | 0      |
| Falck-RuegN | 0.0064 |
| Falck-RuegS | 0      |
| Fehm-Flens  | 0      |
| Fehm-RueN   | 0.0102 |
| Fehm-RuegS  | 0.0015 |
| Fehm-Salz   | 0.0031 |
| Flens-ReugN | 0.0033 |
| Flens-RuegS | 0.0079 |
| Flens-Salz  | 0      |
| RuegN-RuegS | 0      |
| RuegN-Salz  | 0      |

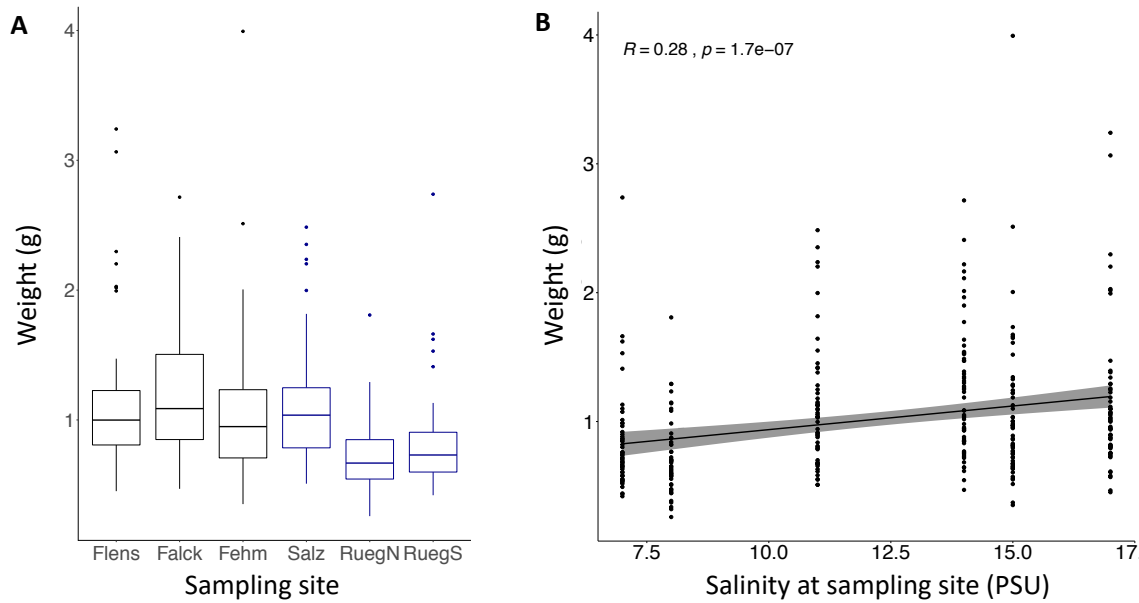

**Supplement figure S7: Weight of adult pipefish.** The weight of pipefish (y-axis) is plotted for different sampling site (x-axis) (A), and correlated with the salinity at the different sampling sites (B).

**Supplement table S7A: Analysis of variance (ANOVA) for length of adult pipefish**

Fixed factors are *Sex*, *Origin salinity*, *Acclimation salinity* and *Sampling site* nested in *Origin salinity*.

| Full model – Adult length                 | Df  | Sum Sq  | Mean Sq | F value | p                  |
|-------------------------------------------|-----|---------|---------|---------|--------------------|
| Sex                                       | 1   | 8.82    | 8.824   | 2.4     | 0.123              |
| <b>Origin salinity</b>                    | 1   | 182.00  | 182.004 | 49.4    | <b>&lt; 0.001*</b> |
| Acclimation salinity                      | 1   | 3.19    | 3.189   | 0.9     | 0.353              |
| Sex: Origin salinity                      | 1   | 1.44    | 1.443   | 0.4     | 0.531              |
| Sex: Acclimation salinity                 | 1   | 0.10    | 0.105   | 0.0     | 0.866              |
| <b>Origin salinity:Acclim salinity</b>    | 1   | 27.27   | 27.269  | 7.4     | <b>0.006*</b>      |
| <b>Origin salinity:Sampling site</b>      | 4   | 166.46  | 41.616  | 11.3    | <b>&lt; 0.001*</b> |
| Sex: Origin salinity:Acclimation salinity | 1   | 2.52    | 2.525   | 0.7     | 0.409              |
| Residuals                                 | 320 | 1179.79 | 3.687   |         |                    |

| Reduced model                               | Df  | Sum Sq | Mean Sq | F value | p                  |
|---------------------------------------------|-----|--------|---------|---------|--------------------|
| <b>Origin salinity</b>                      | 1   | 182.0  | 182.0   | 49.4    | <b>&lt; 0.001*</b> |
| Acclimation salinity                        | 1   | 3.2    | 3.2     | 0.8     | 0.353              |
| <b>Origin salinity:Acclimation salinity</b> | 1   | 26.7   | 27.3    | 7.4     | <b>0.007</b>       |
| <b>Origin salinity:Sampling site</b>        | 4   | 165.0  | 41.6    | 11.3    | <b>&lt; 0.001*</b> |
| Residuals                                   | 320 | 1179.8 | 3.7     |         |                    |

**Supplement table S7B: Post hoc test Tukey HSD for body length of adult pipefish contrasting different salinity histories, i.e. salinity origin and acclimation salinity.**

|                     | Estimate | Std. Error | t value | Pr(> t )           |
|---------------------|----------|------------|---------|--------------------|
| <i>HL – HH == 0</i> | -0.72    | 0.30       | -2.3    | 0.083              |
| <i>LH – HH == 0</i> | -2.08    | 0.32       | -6.4    | <b>&lt; 0.001*</b> |
| <i>LL – HH == 0</i> | -1.66    | 0.32       | -5.2    | <b>&lt; 0.001*</b> |
| <i>LH – HL == 0</i> | -1.36    | 0.32       | -4.3    | <b>&lt; 0.001*</b> |
| <i>LL – HL == 0</i> | -0.94    | 0.31       | -3.0    | <b>0.014</b>       |
| <i>LL – LH == 0</i> | 0.41     | 0.33       | 1.2     | 0.583              |

**Supplement table S7C: Post hoc test Tukey HSD for body length of adult pipefish contrasting sampling sites.**

|                           | Estimate | Std. Error | t value | Pr(> t )           |
|---------------------------|----------|------------|---------|--------------------|
| Fehm – Falck == 0         | -0.7373  | 0.3566     | -2.067  | 0.307              |
| Flens – Falck == 0        | -0.1271  | 0.3537     | -0.359  | 0.999              |
| <b>RuegN – Falck == 0</b> | -2.8133  | 0.3765     | -7.471  | <b>&lt; 0.001*</b> |
| <b>RuegS – Falck == 0</b> | -2.1409  | 0.3684     | -5.811  | <b>&lt; 0.001*</b> |
| Salz – Falck == 0         | -0.4729  | 0.3666     | -1.290  | 0.790              |
| Flens – Fehm == 0         | 0.6102   | 0.3537     | 1.725   | 0.516              |
| <b>RuegN – Fehm == 0</b>  | -2.0760  | 0.3765     | -5.513  | <b>&lt; 0.001*</b> |
| <b>RuegS – Fehm == 0</b>  | -1.4036  | 0.3684     | -3.810  | <b>0.002*</b>      |
| Salz – Fehm == 0          | 0.2644   | 0.3666     | 0.721   | 0.979              |
| <b>RuegN – Flens == 0</b> | -2.6862  | 0.3738     | -7.187  | <b>&lt; 0.001*</b> |
| <b>RuegS – Flens == 0</b> | -2.0138  | 0.3656     | -5.508  | <b>&lt; 0.001*</b> |
| Salz – Flens == 0         | -0.3459  | 0.3637     | -0.951  | 0.933              |
| ReugS – RuegN == 0        | 0.6724   | 0.3877     | 1.734   | 0.510              |
| <b>Salz – RuegN == 0</b>  | 2.3404   | 0.3860     | 6.063   | <b>&lt; 0.001*</b> |
| <b>Salz – RuegS == 0</b>  | 1.6680   | 0.3781     | 4.412   | <b>&lt; 0.001*</b> |

**Supplement table S8A: Analysis of variance (ANOVA) for brood size of adult pipefish**

Fixed factors are *Origin salinity*, *Acclimation salinity* and *Sampling site* nested in *Origin salinity*.

| Full model                                  | Df  | Sum Sq | Mean Sq | F value | p             |
|---------------------------------------------|-----|--------|---------|---------|---------------|
| Origin salinity                             | 1   | 5.0    | 5.0     | 2.0     | 0.160         |
| <b>Acclimation salinity</b>                 | 1   | 41.2   | 41.2    | 15.0    | <b>0.001*</b> |
| <b>Av male length</b>                       | 1   | 14.6   | 14.6    | 5.8     | <b>0.017*</b> |
| <b>Origin salinity:Acclimation salinity</b> | 1   | 25.6   | 25.6    | 9.0     | <b>0.003*</b> |
| Origin salinity:Sampling site               | 2   | 9.1    | 4.6     | 1.8     | 0.168         |
| Origin salinity:Av male length              | 1   | 0.4    | 0.4     | 0.1     | 0.705         |
| Acclimation salinity:Av male length         | 1   | 1.3    | 1.3     | 0.5     | 0.474         |
| Origin sal: Acclim sal:Av male length       | 1   | 31.7   | 31.7    | 12.6    | <b>0.001*</b> |
| Residuals                                   | 109 | 273.6  | 2.5     |         |               |

**Supplement table 8B: Post hoc test Tukey HSD for clutch size of adult pipefish salinity histories.**

The italic letter represents the origin salinity (*H* - High, *L* - Low) and the second letter indicates the salinity level in the lab (*H* - High, *L* - Low).

|                                   | Estimate Std. | Error | t value | p                  |
|-----------------------------------|---------------|-------|---------|--------------------|
| <b><i>HL</i> - <i>HH</i> == 0</b> | -22.4         | 4.6   | -4.8    | <b>&lt; 0.001*</b> |
| <b><i>LH</i> - <i>HH</i> == 0</b> | -14.0         | 4.5   | -3.1    | <b>0.010*</b>      |
| <b><i>LL</i> - <i>HH</i> == 0</b> | -16.5         | 4.5   | -3.6    | <b>0.003*</b>      |
| <i>LH</i> - <i>HL</i> == 0        | 8.4           | 4.8   | 1.7     | 0.512              |
| <i>LL</i> - <i>HL</i> == 0        | 5.8           | 4.8   | 1.2     | 0.762              |
| <i>LL</i> - <i>LH</i> == 0        | -2.5          | 4.7   | -0.5    | 0.976              |

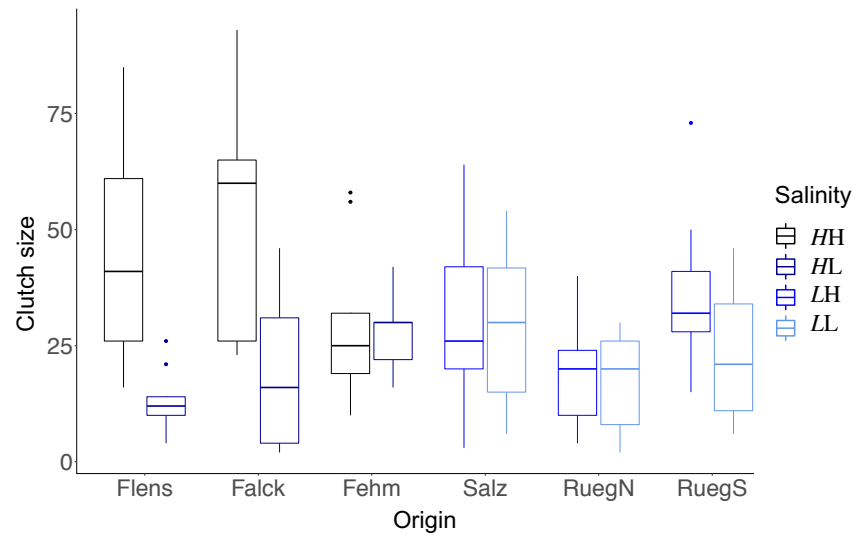

### Supplement Figure 8C: Clutch size is reduced at low salinity for all sampling sites

Number of juveniles (clutch size) is shown for pipefish from different origins (sampling site). Italic letters and colors indicate the salinity level at the origin of (*H*: 15 PSU, black & dark blue; *L*: 7 PSU, blue & light blue). The 2nd letter indicates the salinity during breeding in the lab (*H*: 15 PSU, black and blue; *L*: 7 PSU, dark & light blue).

**Table S9: PERMANOVA statistics of female gene expression for all sampling sites.** A PERMANOVA was applied to gene expression ( $-\Delta\text{Ct}$  values) of all 155 samples for all genes and gene groups, including immune genes, which are comprised of the innate, adaptive and complement genes, as well as genes involved in metabolism, osmoregulation and epigenetics, e.g. methylation or histone modification. Results are based on euclidian distance matrices with 1000 permutations. Significant p-values are in bold. K is a factor for body size, integrating total length and weight of individuals( $\text{weight}/(\text{length}^3)$ ).

|                                       | All genes |            |               | Immune     |               | Innate     |               | Adaptive |       | Complement |       |
|---------------------------------------|-----------|------------|---------------|------------|---------------|------------|---------------|----------|-------|------------|-------|
|                                       | Df        | F Model    | Pr (>F)       | F          | Pr            | F          | Pr            | F        | Pr    | F          | Pr    |
| <b>Origin salinity</b>                | 1         | <b>2.6</b> | <b>0.017*</b> | <b>3.1</b> | <b>0.010*</b> | <b>4.0</b> | <b>0.002*</b> | 2.1      | 0.115 | 0.8        | 0.428 |
| Acclimation salinity                  | 1         | 1.3        | 0.193         | 1.3        | 0.207         | 1.5        | 0.149         | 0.7      | 0.500 | 0.8        | 0.423 |
| K                                     | 1         | 1.4        | 0.155         | 1.4        | 0.182         | 1.0        | 0.290         | 0.1      | 0.841 | 2.8        | 0.070 |
| Origin salinity: Acclimation salinity | 1         | 0.7        | 0.667         | 0.8        | 0.569         | 0.9        | 0.469         | 0.3      | 0.788 | 0.3        | 0.729 |
| Origin salinity:Sampling site         | 4         | 1.1        | 0.342         | 1.2        | 0.244         | 1.3        | 0.163         | 1.4      | 0.173 | 0.8        | 0.590 |
| Residuals                             | 146       |            |               |            |               |            |               |          |       |            |       |

|                                       | Epigenetic |     |       | Activating |       | Silencing  |               | Metabolism |       |
|---------------------------------------|------------|-----|-------|------------|-------|------------|---------------|------------|-------|
|                                       | Df         | F   | Pr    | F          | Pr    | F          | Pr            | F          | Pr    |
| Origin salinity                       | 1          | 0.6 | 0.760 | 0.5        | 0.719 | 0.6        | 0.630         | 1.3        | 0.289 |
| <b>Acclimation salinity</b>           | 1          | 1.6 | 0.139 | 1.6        | 0.920 | <b>2.9</b> | <b>0.044*</b> | 0.3        | 0.878 |
| K                                     | 1          | 1.1 | 0.224 | 1.1        | 0.376 | 1.4        | 0.152         | 1.9        | 0.086 |
| Origin salinity: Acclimation salinity | 1          | 0.4 | 0.899 | 0.4        | 0.722 | 0.3        | 0.905         | 0.6        | 0.594 |
| Origin salinity:Sampling site         | 4          | 0.8 | 0.778 | 0.8        | 0.645 | 0.7        | 0.747         | 1.0        | 0.477 |

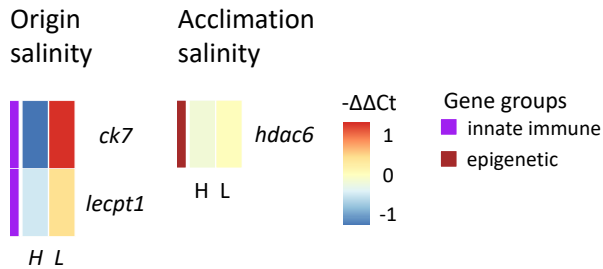

**Figure S9A: Gene expression patterns of pipefish females.**

Non-hierarchical gene expression heatmap for genes, which are significantly differentially expressed ( $-\Delta\Delta C_t$ ) in response to *origin salinity* or *acclimation salinity*. Genes are sorted by gene groups, which are assigned to different colors (purple: innate immune, brown: epigenetic).

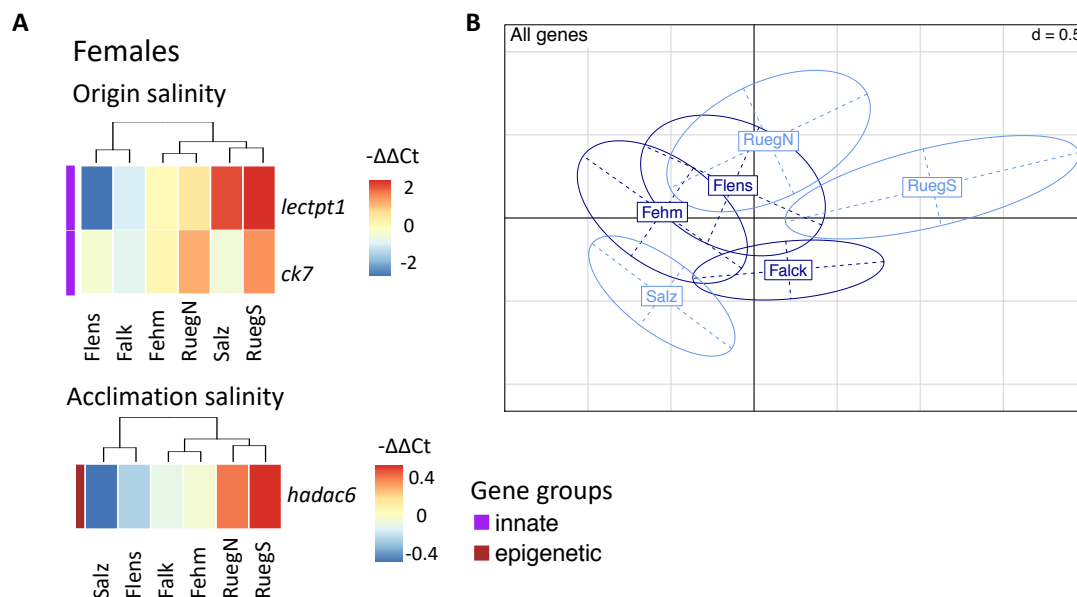

**Figure 9B: Gene expression patterns of pipefish females.**

**A:** Hierarchical gene expression heatmap for genes which are significantly differentially expressed ( $-\Delta\Delta C_t$ ) due to genetic background (*origin salinity*) or phenotypic plasticity (*acclimation salinity*). Genes are sorted by gene groups which are assigned to different colors (purple: innate immune, brown: epigenetic)

**B:** Principal component analysis (PC1: 27.5%; PC2: 19.8%) of all genes visualizing the salinity origin effect.

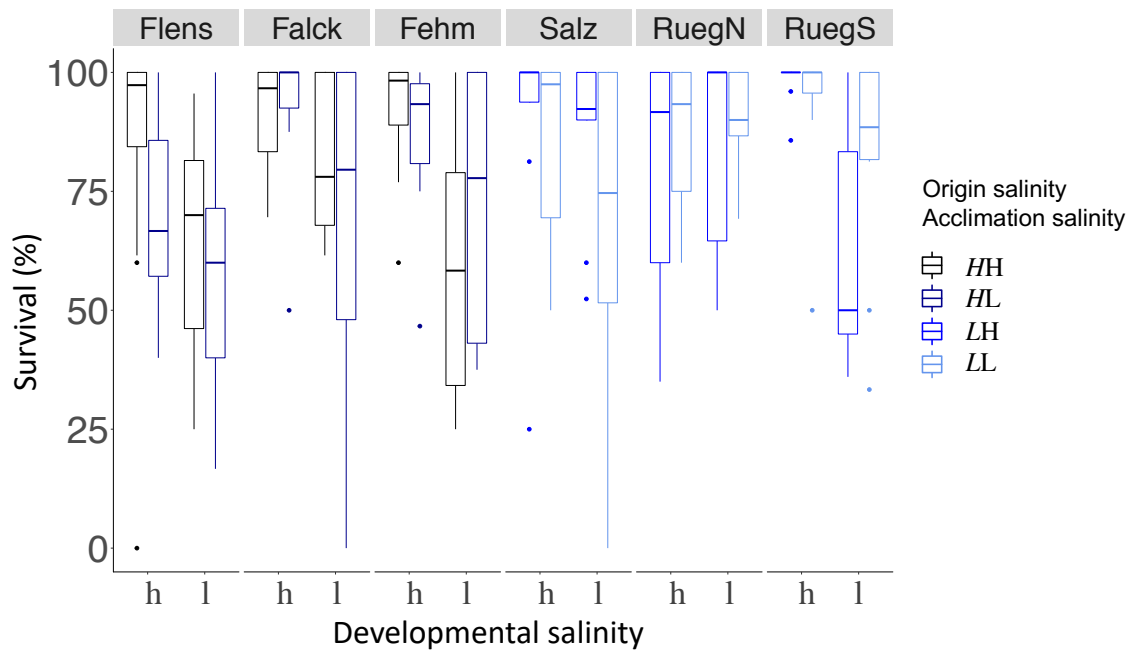

**Figure S10: Juvenile survival 10 days post hatch**

The percentage of juveniles that survived the first 10 days post hatch (%) are plotted on the y-axis. The x-axis indicates the *developmental salinity* (h – high/15 PSU, l – low/7PSU). Panels denote the *sampling sites*. Italic letters and colors specify the *origin salinity* (H: 15 PSU, black & dark blue; L: 7 PSU blue & light blue). The 2nd letter indicates the *acclimation salinity* (H: 15 PSU, black and blue; L: 7 PSU, dark & light blue).

**Table S10A: Analysis of Deviance Table (Type II tests) for juvenile survival in the first 10 days post hatch.** To test for differences between treatments we used a generalized linear model (glm). Survival was measured as ratio of dead and alive fish, i.e. dead fish were noted in one column, alive one in an other (using cbind function). Fixed factors are comprised of *origin salinity*, *acclimation salinity*, *developmental salinity* and *origin salinity:sampling site*.

|                                                             | df       | Chisq        | p                  |
|-------------------------------------------------------------|----------|--------------|--------------------|
| Origin salinity                                             | 1        | 2.6          | 0.108              |
| Acclimation salinity                                        | 1        | 1.4          | 0.236              |
| <b>Developmental salinity</b>                               | 1        | <b>192.8</b> | <b>&lt; 0.001*</b> |
| <b>Origin salinity:Acclimation salinity</b>                 | <b>1</b> | <b>6.1</b>   | <b>0.013*</b>      |
| Origin salinity:Developmental salinity                      | 1        | 3.8          | 0.050              |
| Acclimation salinity:Developmental salinity                 | 1        | 2.8          | 0.094              |
| Origin salinity:Sampling site                               | 4        | 24.1         | < 0.001            |
| Origin salinity:Acclimation salinity:Developmental salinity | 1        | 0.0          | 0.970              |



| Reduced model                                | Df       | Chisq        | p                  |
|----------------------------------------------|----------|--------------|--------------------|
| Origin salinity                              | 1        | 2.6          | 0.108              |
| Acclimation salinity                         | 1        | 1.4          | 0.236              |
| <b>Offspring salinity</b>                    | 1        | <b>192.8</b> | <b>&lt; 0.001*</b> |
| <b>Origin salinity: Acclimation salinity</b> | <b>1</b> | <b>6.1</b>   | <b>0.013*</b>      |
| Origin salinity:Developmental salinity       | 1        | 3.8          | 0.050              |
| Acclimation salinity: Developmental salinity | 1        | 2.8          | 0.094              |
| <b>Origin salinity:Sampling site</b>         | 4        | <b>24.1</b>  | <b>&lt; 0.001*</b> |

**Table S10B: Post hoc test, Tukey HSD for juvenile survival for significant origin salinity: Acclimation salinity interaction.** Italic letter indicates origin salinity (H – High or L – low) and second letter acclimation salinity (H - High or L - low).

|                       | Estimate     | Std. Error  | z value     | Pr (> z )     |
|-----------------------|--------------|-------------|-------------|---------------|
| <i>HL - HH</i>        | 0.27         | 0.13        | 2.1         | 0.148         |
| <i>LH - HH</i>        | -0.00        | 0.11        | -3.6        | 1.000         |
| <i>LL - HH</i>        | -0.11        | 0.12        | -5.0        | 0.783         |
| <i>LH - HL</i>        | -0.27        | 0.14        | -3.6        | 0.218         |
| <b><i>LL - HL</i></b> | <b>-0.38</b> | <b>0.14</b> | <b>-3.4</b> | <b>0.043*</b> |
| <i>LL - LH</i>        | -0.11        | 0.13        | -4.7        | 0.842         |

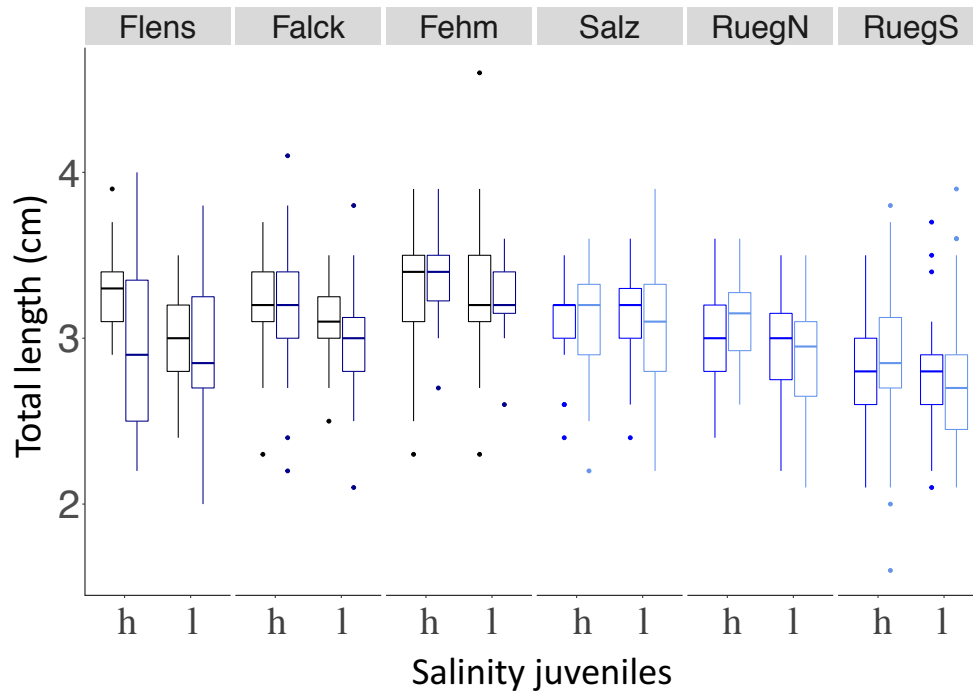

**Figure S11: Juvenile size 10 days post hatch**

Juvenile size (cm) 10 days post hatch is plotted on the y-axis. The x-axis indicates the *developmental salinity* (h – high/15 PSU, l – low/7 PSU). Panels denote the *sampling sites*. Italic letters and colours specify the *origin salinity* (H: 15 PSU, black & dark blue; L: 7 PSU blue & light blue). The 2nd letter indicates the *acclimation salinity* (H: 15 PSU, black and blue; L: 7 PSU, dark & light blue).

**Table S11: Analysis of variance (ANOVA) for juvenile size first 10 days post hatch** Fixed factors are *Sex*, *Origin salinity*, *Acclimation salinity* and *Sampling site* nested in *Origin salinity*.

|                                                              | Df  | Sum Sq | Mean Sq | F value | p                  |
|--------------------------------------------------------------|-----|--------|---------|---------|--------------------|
| <b>Origin salinity</b>                                       | 1   | 10.4   | 10.4    | 86.2    | <b>&lt; 0.001*</b> |
| Acclimation salinity                                         | 1   | 0.3    | 0.3     | 2.2     | 0.136              |
| <b>Developmental salinity</b>                                | 1   | 2.1    | 2.1     | 17.4    | <b>&lt; 0.001*</b> |
| Origin salinity:Acclimation salinity                         | 1   | 0.2    | 0.2     | 2.2     | 0.192              |
| Origin salinity:Deveoplemtal salinity                        | 1   | 0.3    | 0.3     | 0.72    | 0.136              |
| Acclimation salinity:Develop salinity                        | 1   | 0.2    | 0.2     | 1.4     | 0.235              |
| <b>Origin salinity:Sampling site</b>                         | 4   | 10.0   | 2.5     | 20.9    | <b>&lt; 0.001*</b> |
| Origin salinity:Acclimation salinity :Developmental salinity | 1   | 0.1    | 0.1     | 1.2     | 0.270              |
| Residuals                                                    | 782 | 94.0   | 0.1     |         |                    |

| Reduced model                        | Df  | Sum Sq | Mean Sq | F value | p                  |
|--------------------------------------|-----|--------|---------|---------|--------------------|
| <b>Origin salinity</b>               | 1   | 10.3   | 10.4    | 85.9    | <b>&lt; 0.001*</b> |
| Acclimation salinity                 | 1   | 0.3    | 0.3     | 2.2     | 0.136              |
| <b>Developmental salinity</b>        | 1   | 2.1    | 2.1     | 17.4    | <b>&lt; 0.001*</b> |
| <b>Origin salinity:Sampling site</b> | 4   | 10.0   | 2.5     | 20.7    | <b>&lt; 0.001*</b> |
| Residuals                            | 786 | 94.8   | 0.1     |         |                    |

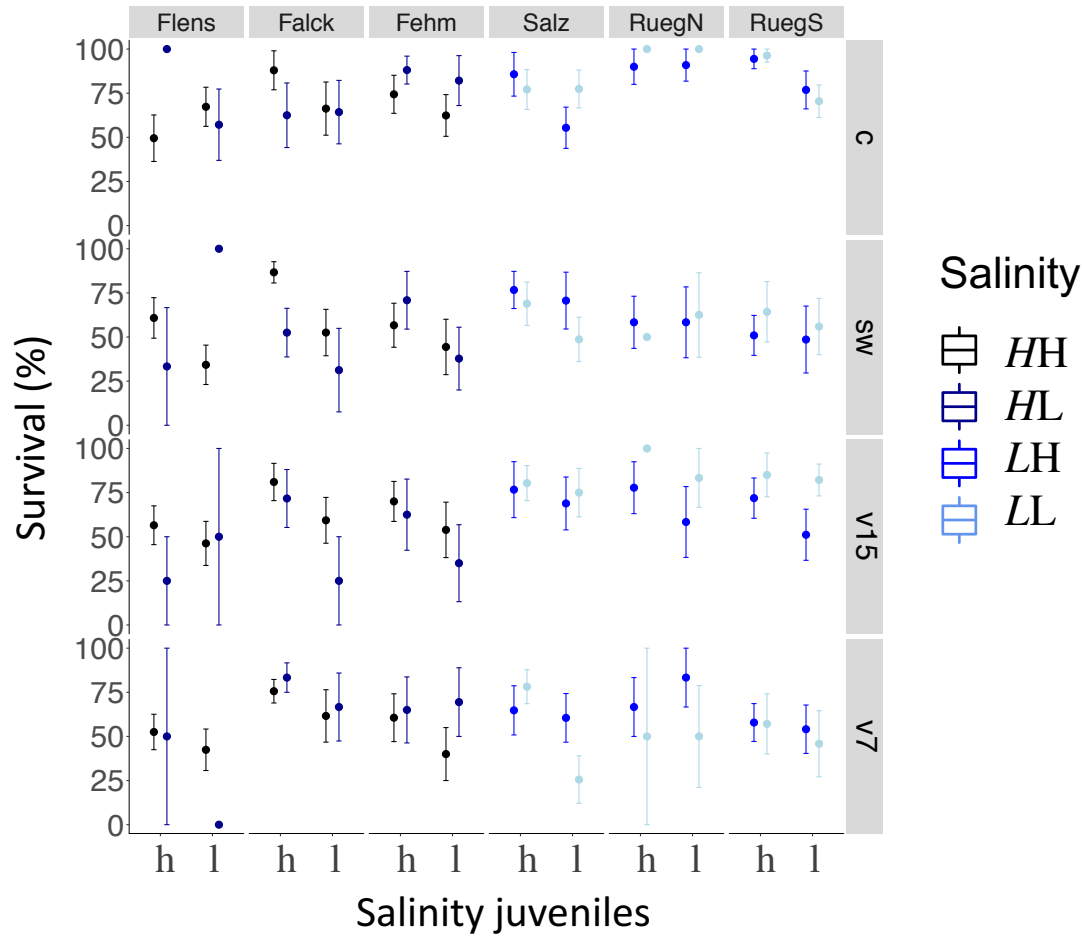

**Figure S12: Juvenile survival six days post injection.**

Juvenile survival six days post infection is plotted on the y axis for different *treatments*: control (c), sham injection with seawater (sw), injection with *V. alginolyticus* evolved at 15 PSU (v15) or at 7 PSU (v7). Survival is plotted for each sampling site separately (Flensburg, Falckenstein, Fehmarn, Salzhaff, Ruegen North and Ruegen South). The x-axis indicates the *developmental salinity* after hatching (h – high/15 PSU, l – low/7PSU). Italic letters and colors specify *origin salinity* of the parental generation (H: 15 PSU, black & dark blue; L: 7 PSU, blue & light blue). The 2nd letter indicates *acclimation salinity* in the lab (H: 15 PSU, black and blue; L: 7 PSU, dark & light blue).

**Table S12A: Analysis of Deviance Table (Type II tests) for endpoint mortality of juvenile survival after infection.** To test for differences between treatments we used a generalized linear model (glm). Survival was measured as ratio of dead and alive fish. Fixed factors are comprised of *origin salinity*, *acclimation salinity*, *Offspring salinity* and *Origin salinity:Sampling site*. Table factors and interactions of the reduced model.

|                                                       | df | Chisq | p                  |
|-------------------------------------------------------|----|-------|--------------------|
| <b>Origin salinity</b>                                | 1  | 9.1   | <b>0.003*</b>      |
| Acclimation salinity                                  | 1  | 0.0   | 0.910              |
| <b>Developmental salinity</b>                         | 1  | 40.2  | <b>&lt; 0.001*</b> |
| <b>Treatment</b>                                      | 3  | 50.9  | <b>&lt; 0.001*</b> |
| Origin salinity:Acclimation salinity                  | 1  | 1.0   | 0.312              |
| Origin salinity:Treatment                             | 1  | 6.6   | 0.084              |
| Acclimation salinity:Treatment                        | 1  | 0.3   | 0.959              |
| Origin salinity:Developmental salinity                | 4  | 0.3   | 0.616              |
| Parental acclimation salinity:Developmental salinity  | 1  | 0.1   | 0.704              |
| Treatment:Origin salinity                             | 3  | 2.3   | 0.514              |
| <b>Origin salinity:Sampling site</b>                  | 4  | 39.5  | <b>&lt; 0.001*</b> |
| <b>Origin salinity:Acclimation salinity:Treatment</b> | 3  | 13.0  | <b>0.005*</b>      |

**Table S12B: Tukey HSD for juvenile survival after injection.** Table shows significant and discussed post hoc pairwise comparisons of the significant interaction between *origin salinity*, *acclimation salinity* and *treatment* on juvenile mortality. Abbreviations: *L/H* – *origin salinity*; *H/L* – *acclimation salinity*; *v15/v7/sw/c* – *treatment* (*v15*: *Vibrio* evolved at 15 PSU; *v7*: *Vibrio* evolved at 7 PSU; *sw*: injection with autoclaved seawater; *c*: control, i.e. no injection)

|                      | Estimate | Std. Error | z value | Pr (> z ) |
|----------------------|----------|------------|---------|-----------|
| <i>LHc - HHsw</i>    | -1.25    | 0.27       | -4.7    | < 0.01*   |
| <i>HLc - HHv15</i>   | -1.07    | 0.30       | -3.6    | 0.030*    |
| <i>LHc - HHv15</i>   | -1.34    | 0.27       | -5.0    | < 0.01*   |
| <i>LLc - HHv15</i>   | -0.90    | 0.25       | -3.6    | 0.026*    |
| <i>LLv15 - HHv15</i> | -1.04    | 0.30       | -3.4    | 0.046*    |
| <i>LHc - HHv7</i>    | -1.27    | 0.27       | -4.7    | < 0.01*   |
| <i>HLsw - HLc</i>    | 1.31     | 0.38       | 3.5     | 0.039*    |
| <i>HLv15 - HLc</i>   | 1.36     | 0.38       | 3.6     | 0.028*    |
| <i>LHc - HLsw</i>    | -1.59    | 0.35       | -4.5    | < 0.01*   |
| <i>LHc - HLv15</i>   | -1.64    | 0.36       | -4.6    | < 0.01*   |
| <i>LLc - HLv15</i>   | -1.19    | 0.34       | -3.4    | 0.040*    |
| <i>LLv15 - HLv15</i> | -1.33    | 0.38       | -3.5    | 0.038*    |
| <i>LHsw - LHc</i>    | 1.31     | 0.30       | 4.3     | < 0.01*   |
| <i>LHv7 - LHc</i>    | 1.16     | 0.30       | 3.9     | < 0.01*   |
| <i>LLv7 - LHc</i>    | 1.30     | 0.31       | 3.2     | < 0.01*   |
| <i>LHv15 - HHv15</i> | -0.39    | 0.25       | -1.5    | 0.971     |

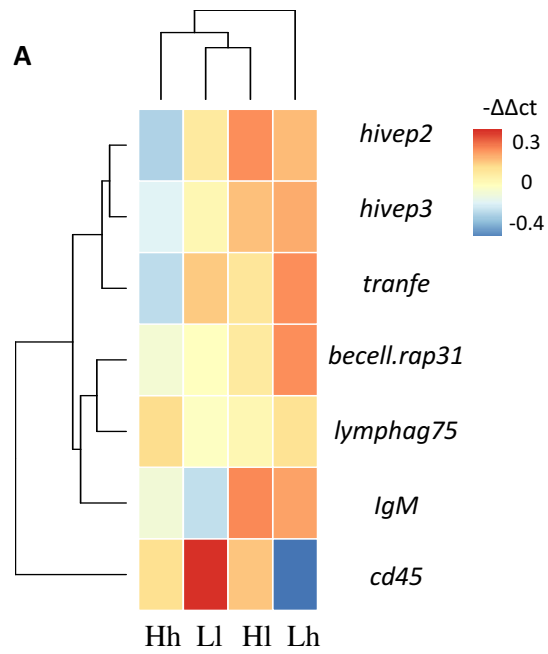

**Supplement figure S 13: Hierarchical heat map of juvenile gene expression ( $-\Delta\Delta C_t$ ) for adaptive immune genes.** Capital letters indicate parental acclimation salinity (H - high and L - low). Small letters indicate *developmental salinity* (h - high, l - low).

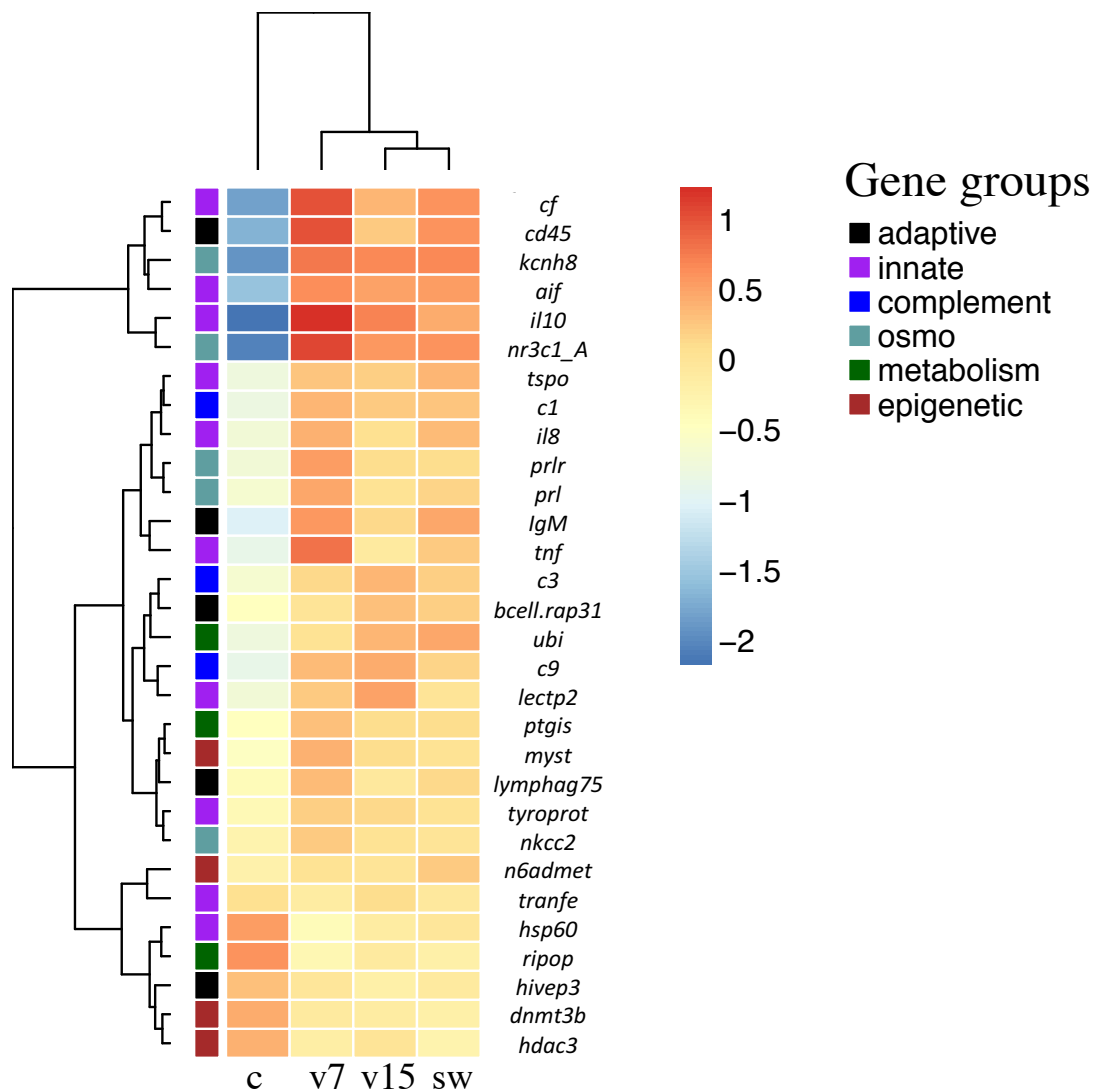

**Supplement Figure S 14: Hierarchical heat map of juvenile gene expression (-ΔΔCt) for genes differentially expressed 10 days post hatch treatment: untreated control (c), injection with *Vibrio alginolyticus* evolved at 7 PSU (v7) or *V. alginolyticus* evolved at 15 PSU (v15) and sham injection with seawater (sw).**



## References supplement material

- Altschul, S. F., W. Gish, W. Miller, E. W. Myers and D. J. Lipman (1990). "BASIC LOCAL ALIGNMENT SEARCH TOOL." Journal of Molecular Biology **215**(3): 403-410.
- Cutler, C. P., A.-S. Martinez and G. Cramb (2007). "The role of aquaporin 3 in teleost fish." Comparative Biochemistry and Physiology Part A: Molecular & Integrative Physiology **148**(1): 82-91.
- Gutman, G. A., K. G. Chandy, S. Grissmer, M. Lazdunski, D. McKinnon, L. A. Pardo, G. A. Robertson, B. Rudy, M. C. Sanguinetti, W. Stühmer and X. Wang (2005). "International Union of Pharmacology. LIII. Nomenclature and Molecular Relationships of Voltage-Gated Potassium Channels." Pharmacological Reviews **57**(4): 473.
- Haase, D., O. Roth, M. Kalbe, G. Schmiedeskamp, J. P. Scharsack, P. Rosenstiel and T. B. H. Reusch (2013). "Absence of major histocompatibility complex class II mediated immunity in pipefish, *Syngnathus typhle*: evidence from deep transcriptome sequencing." Biology Letters **9**(2): 6.
- Hwang, P.-P. and T.-H. Lee (2007). "New insights into fish ion regulation and mitochondrion-rich cells." Comparative Biochemistry and Physiology Part A: Molecular & Integrative Physiology **148**(3): 479-497.
- Larsson, A. (2014). "AliView: a fast and lightweight alignment viewer and editor for large datasets." Bioinformatics (Oxford, England) **30**(22): 3276-3278.
- Manzon, L. A. (2002). "The role of prolactin in fish osmoregulation: A review." General and Comparative Endocrinology **125**(2): 291-310.
- Marshall, W. S., R. R. F. Cozzi, R. M. Pelis and S. D. McCormick (2005). "Cortisol receptor blockade and seawater adaptation in the euryhaline teleost *Fundulus heteroclitus*." Journal of Experimental Zoology Part A: Comparative Experimental Biology **303A**(2): 132-142.
- McCormick, S. D. (2001). "Endocrine control of osmoregulation in teleost fish." American Zoologist **41**(4): 781-794.
- Paris, L., L. Tonutti, C. Vannini and G. Bazzoni (2008). "Structural organization of the tight junctions." Biochimica et Biophysica Acta (BBA) - Biomembranes **1778**(3): 646-659.
- Ronkin, D., E. Seroussi, T. Nitzan, A. Doron-Faigenboim and A. Cnaani (2015). "Intestinal transcriptome analysis revealed differential salinity adaptation between two tilapiine species." Comparative Biochemistry and Physiology Part D: Genomics and Proteomics **13**: 35-43.
- Roth, O., M. H. Solbakken, O. K. Tørresen, T. Bayer, M. Matschiner, H. T. Baalsrud, S. N. K. Hoff, M. S. O. Briauc, D. Haase, R. Hanel, T. B. H. Reusch and S. Jentoft (2020). "Evolution of male pregnancy associated with remodeling of canonical vertebrate immunity in seahorses and pipefishes." Proceedings of the National Academy of Sciences **117**(17): 9431.
- Taugbol, A., T. Arntsen, K. Ostbye and L. A. Vollestad (2014). "Small Changes in Gene Expression of Targeted Osmoregulatory Genes When Exposing Marine and Freshwater Threespine Stickleback (*Gasterosteus aculeatus*) to Abrupt Salinity Transfers." Plos One **9**(9): 9.
- Tomy, S., Y. M. Chang, Y. H. Chen, J. C. Cao, T. P. Wang and C. F. Chang (2009). "Salinity effects on the expression of osmoregulatory genes in the euryhaline black porgy *Acanthopagrus schlegelii*." General and Comparative Endocrinology **161**(1): 123-132.

Velotta, J. P., J. L. Wegrzyn, S. Ginzburg, L. Kang, S. Czesny, R. J. O'Neill, S. D. McCormick, P. Michalak and E. T. Schultz (2017). "Transcriptomic imprints of adaptation to fresh water: parallel evolution of osmoregulatory gene expression in the Alewife." Molecular Ecology **26**(3): 831-848.
